# Supplementary material for: NiS x /NiO/MoS 2 heterostructure for enhanced hydrogen evolution in acidic media and supercapacitor electrode applications
Source: Royal Society of Chemistry journal article supplement (doi:10.1039/d5ra06931a), 2026-01-01
Supplement: d5ra06931a1.pdf [file d5ra06931a1.pdf]

## **Supporting Information**

### **NiS<sub>x</sub>/NiO/MoS<sub>2</sub> Heterostructure for Enhanced Hydrogen Evolution in Acidic Media and Supercapacitor Electrode Applications**

Sumaiya Saleem<sup>1, #</sup>, Muhammad Salman<sup>1, #</sup>, Ilham Noor<sup>2</sup>, Baseena Sardar<sup>1</sup>, Majid  
Khan<sup>1, \*</sup>

<sup>1</sup> Department of Physics, Abdul Wali Khan University Mardan, Mardan 23200, Pakistan

<sup>2</sup> Department of Physics, University of Malakand, Chakdara, 18800, Pakistan

<sup>#</sup> These two authors equally contributed to this work

<sup>\*</sup> Corresponding author: Dr. Majid Khan, [majidkhan@awkum.edu.pk](mailto:majidkhan@awkum.edu.pk)

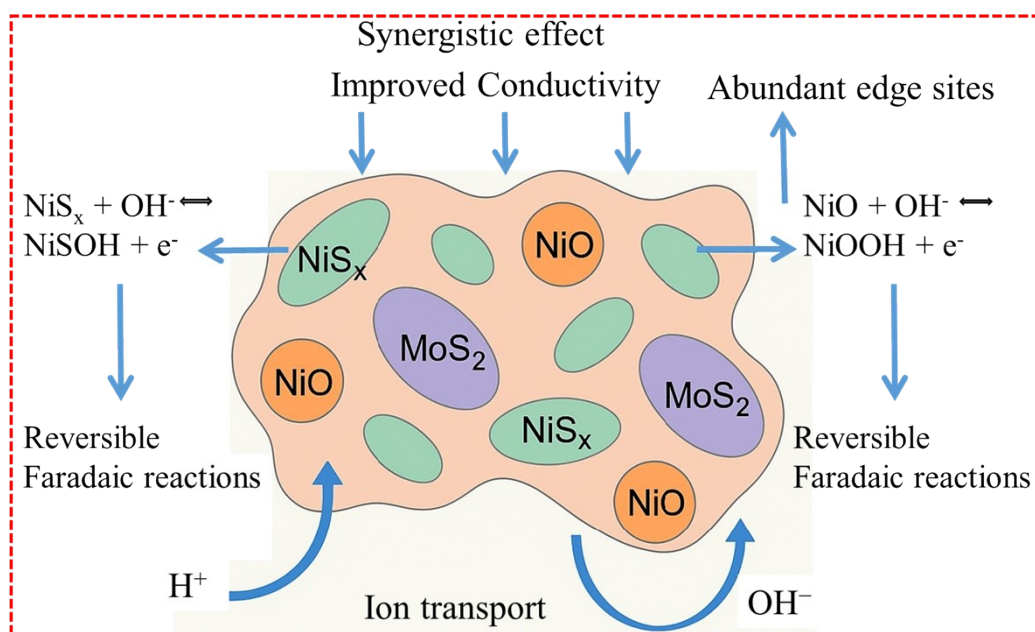

**Figure S1:** Mechanism of the selected electrode materials based on their redox-active components.

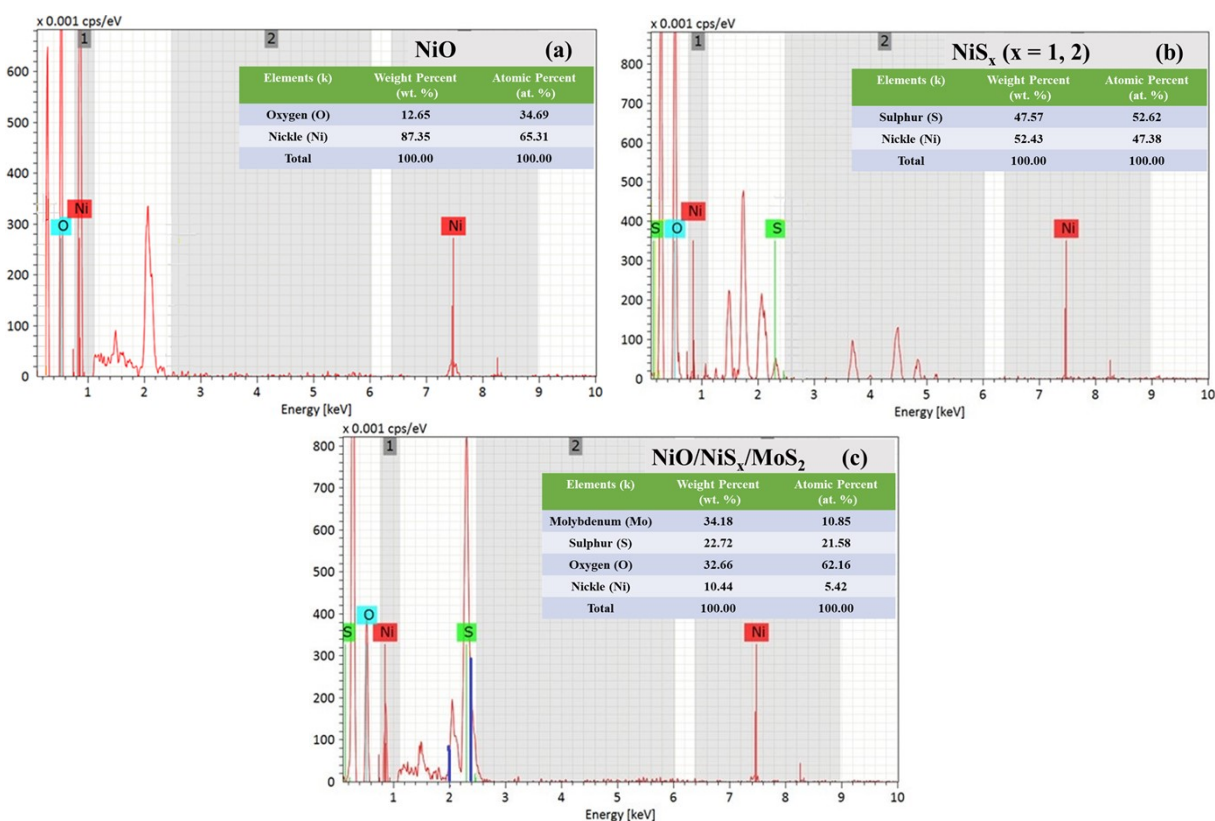

**Figure S2:** EDX results of (a) NiO, (b) NiS<sub>x</sub>, and (c) NiS<sub>x</sub>/NiO/MoS<sub>2</sub> (x = 1, 2) heterostructure.

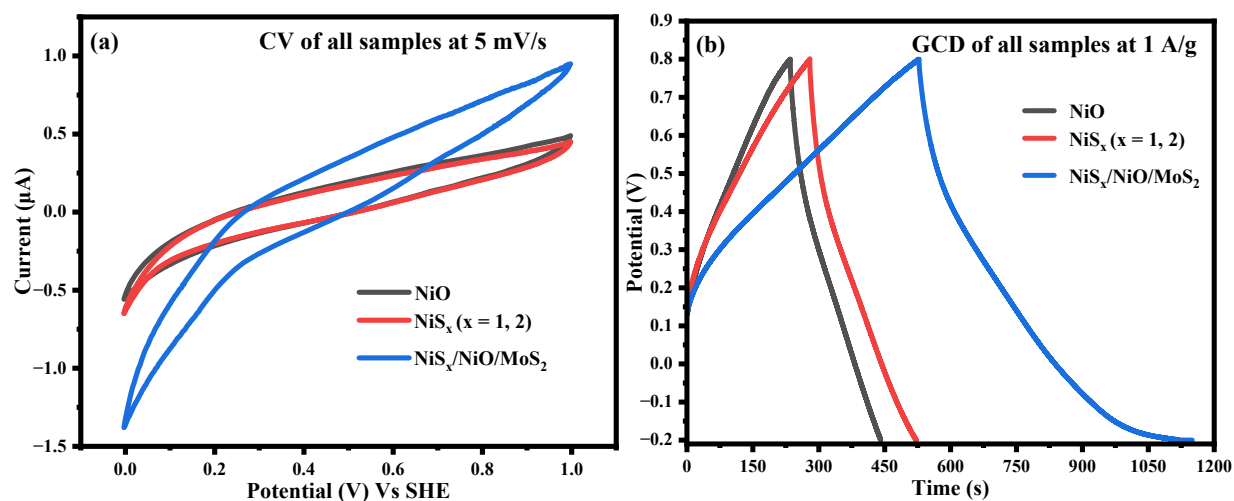

**Figure S3:** (a) CV curves at 5 mV/s, and (b) GCD plots at 1 A/g of all  $\text{NiO}$ ,  $\text{NiS}_x$ , and  $\text{NiS}_x/\text{NiO}/\text{MoS}_2$  ( $x = 1, 2$ ) heterostructure.

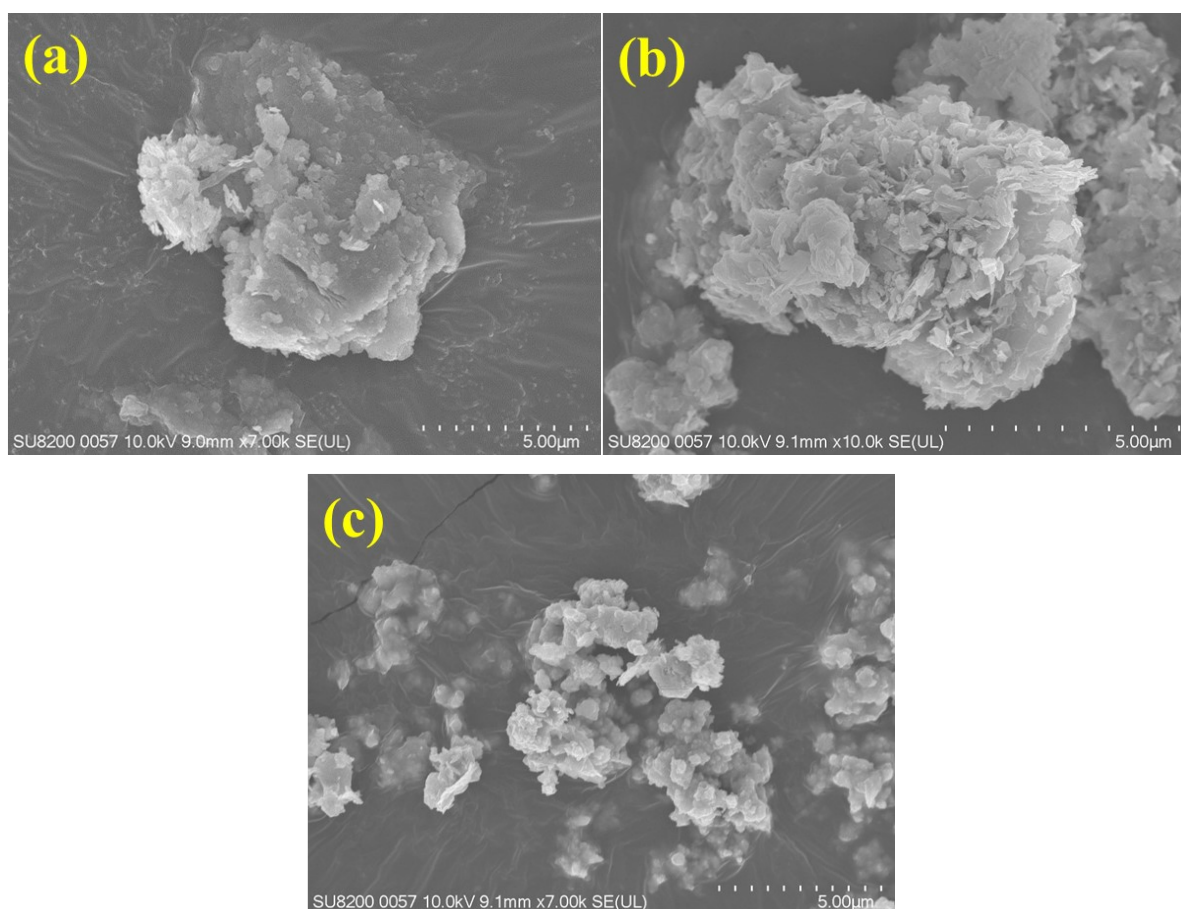

**Figure S4:** SEM images of (a)  $\text{NiO}$ , (b)  $\text{NiS}_x$ , and (c)  $\text{NiS}_x/\text{NiO}/\text{MoS}_2$  ( $x = 1, 2$ ) heterostructure.

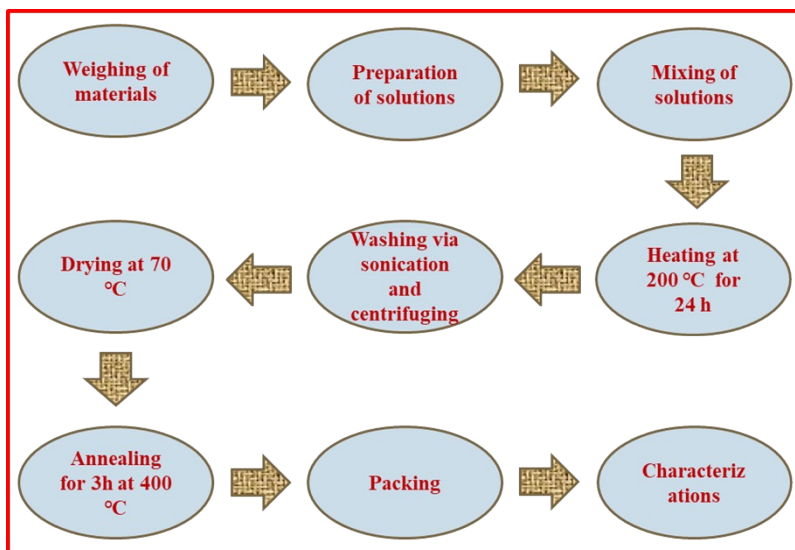

**Figure S5:** Schematic illustration of the synthesis route of the  $\text{NiS}_x/\text{NiO}/\text{MoS}_2$  ( $x = 1, 2$ ) heterostructure.

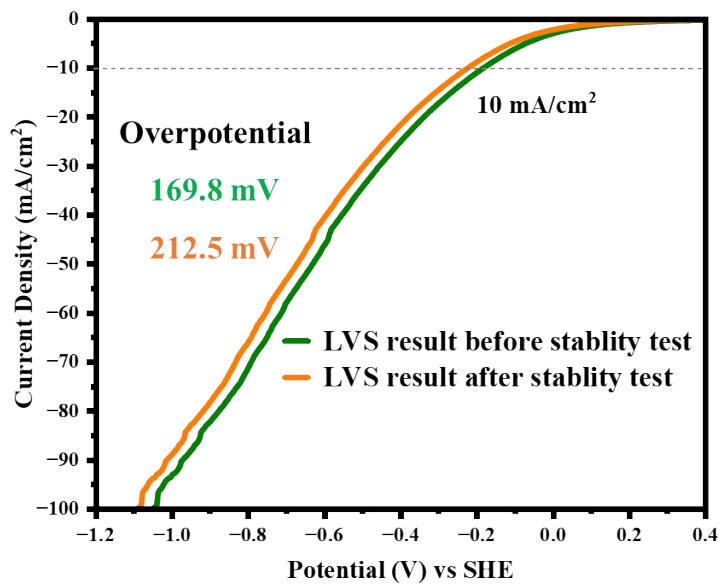

**Figure S6:** LVS results of the prepared composite before and after the stability test of  $\text{NiS}_x/\text{NiO}/\text{MoS}_2$  ( $x = 1, 2$ ) heterostructure.

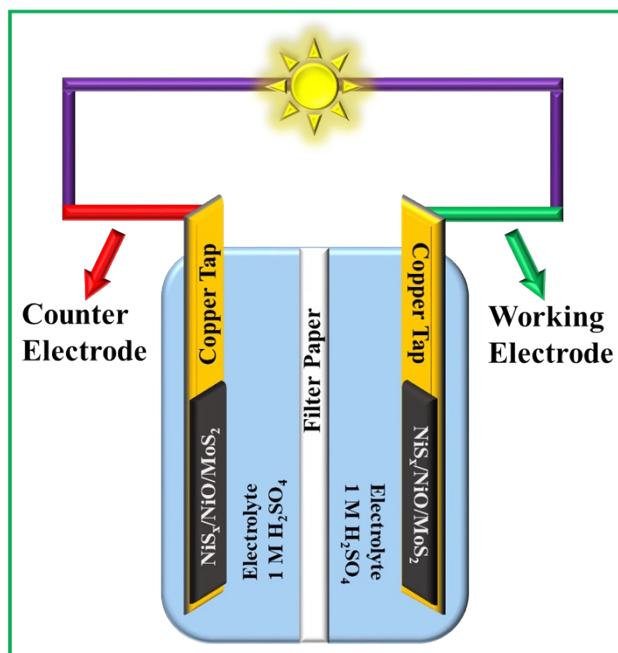

**Figure S7:** Schematic diagram of the symmetric supercapacitor device

**Table S1:** A comparative table that highlights the key features of  $\text{H}_2\text{SO}_4$  and other commonly used hydrogen-based electrolytes

| Electrolyte                  | pH    | Proton conductivity (S/cm) | Redox kinetics | Corrosiveness | Common use in                |
|------------------------------|-------|----------------------------|----------------|---------------|------------------------------|
| 1 M $\text{H}_2\text{SO}_4$  | ~ 0.3 | ~ 0.08                     | Fast           | Moderate      | Supercapacitors, HER/OER     |
| 1 M $\text{HCl}$             | ~ 0.1 | ~ 0.09                     | Fast           | High          | HER, acid corrosion studies  |
| 1 M $\text{HNO}_3$           | ~ 0.3 | ~ 0.07                     | Moderate       | High          | Catalysis, oxidation studies |
| 1 M $\text{CH}_3\text{COOH}$ | ~ 2.4 | ~ 0.002                    | Slow           | Low           | Organic/biochemical systems  |

**Table S2:** Comparison of the overpotential, specific capacitance, synthesis method, and performance notes of NiS<sub>x</sub>/NiO/MoS<sub>2</sub> (x = 1, 2) heterostructure with literature.

| Material                                                                               | Overpotential at 10 mA/cm <sup>2</sup> (mV) | Specific Capacitance (F/g) | Synthesis Method         | Performance Notes                                                                              | Reference |
|----------------------------------------------------------------------------------------|---------------------------------------------|----------------------------|--------------------------|------------------------------------------------------------------------------------------------|-----------|
| NiS/NiS <sub>2</sub> composite with layered structure                                  | 180                                         | 95                         | Hydrothermal             | NiS/NiS <sub>2</sub> composite exhibits excellent HER activity and stability                   | [1]       |
| NiO/NiS <sub>2</sub> /MoS <sub>2</sub> ternary composite with tunable sulfur vacancies | 120                                         | 115                        | Hydrothermal             | NiO/NiS <sub>2</sub> /MoS <sub>2</sub> composite provides high stability and low overpotential | [2]       |
| NiS/MoS <sub>2</sub> composite with MoS <sub>2</sub> edges exposed                     | 150                                         | 125                        | Chemical bath deposition | Enhanced HER efficiency due to the exposed MoS <sub>2</sub> edges                              | [3]       |
| NiS <sub>x</sub> /NiO/MoS <sub>2</sub>                                                 | 166                                         | 428.2425                   | Hydrothermal             |                                                                                                | Our work  |

## References

1. Dhakal, G., Sahoo, S., Sharma, K. P. A Review on the Recent Advancements of Ni-Based Sulfides and Mixed Sulfides for Supercapacitors and Electrocatalysis (Oxygen Evolution Reaction). *Molecules*, 30 (13), 2025.
2. Shah, S. A., Sayyar, R., Xu, L., Sun, H., Khan, I., Guo, J., ... & Ullah, H. In-situ synthesis of NiS<sub>2</sub> nanoparticles/MoS<sub>2</sub> nanosheets hierarchical sphere anchored on reduced graphene oxide for enhanced electrocatalytic hydrogen evolution reaction. *Journal of Colloid and Interface Science*, 624 (18), 2022.
3. Wang, W., Li, L., Tan, S., Wu, K., Zhu, G., Liu, Y., ... & Yang, Y. Preparation of NiS<sub>2</sub>//MoS<sub>2</sub> catalysts by two-step hydrothermal method and their enhanced activity for hydrodeoxygenation of p-cresol. *Fuel*, 179 (37) 2016.
